# Supplementary material for: BEBOP III. Observations and an independent mass measurement of Kepler-16 (AB) b – the first circumbinary planet detected with radial velocities
Source: Oxford University Press journal article supplement (doi:10.1093/mnras/stab3712), 2021-12-22
Supplement: stab3712_supplemental_file.pdf [file stab3712_supplemental_file.pdf]

**APPENDIX A: JOURNAL OF OBSERVATIONS**

Table A1: Journal of Observations containing our SOPHIE data. Flags indicate whether the measurement are excluded from our fiducial analysis with the following reason: W, wrong star; B, bisector outlier; U, high uncertainty; O, other. Dates are given in BJD - 2,400,000.  $V_{\text{rad}}$  are the measured radial velocities with their uncertainties  $\sigma_{V_{\text{rad}}}$ . FWHM is the Full Width at Half Maximum of the Gaussian fitted to the cross correlation function, and *contrast* is its amplitude. Bis. span is the span of the bisector slope. Uncertainties on FWHM and bis. span are  $2 \times \sigma_{V_{\text{rad}}} \cdot H_{\alpha}$  is the equivalent width of  $H_{\alpha}$ , and its uncertainty  $\sigma_{H_{\alpha}}$ .

| flag | BJD-2,400,000<br>[days] | $V_{\text{rad}}$<br>[km s <sup>-1</sup> ] | $\sigma_{V_{\text{rad}}}$<br>[km s <sup>-1</sup> ] | FWHM<br>[km s <sup>-1</sup> ] | contrast | bis. span<br>[km s <sup>-1</sup> ] | $H_{\alpha}$ | $\sigma_{H_{\alpha}}$ |
|------|-------------------------|-------------------------------------------|----------------------------------------------------|-------------------------------|----------|------------------------------------|--------------|-----------------------|
|      | 57578.42404             | -22.7567                                  | 0.0126                                             | 10.4138                       | 22.7274  | -0.0233                            | 0.2119       | 0.0022                |
| B    | 57581.57256             | -20.3465                                  | 0.0444                                             | 10.4924                       | 13.0881  | -0.1227                            | 0.2184       | 0.0055                |
|      | 57582.52743             | -20.4322                                  | 0.0176                                             | 10.3201                       | 27.2220  | -0.0199                            | 0.2046       | 0.0036                |
|      | 57587.43166             | -23.9495                                  | 0.0113                                             | 10.2935                       | 25.8863  | 0.0192                             | 0.2031       | 0.0021                |
|      | 57591.44122             | -29.2376                                  | 0.0146                                             | 10.2883                       | 26.1452  | 0.0538                             | 0.2117       | 0.0029                |
|      | 57595.47979             | -35.3428                                  | 0.0096                                             | 10.3340                       | 29.0424  | 0.0125                             | 0.2039       | 0.0020                |
|      | 57604.43905             | -46.8841                                  | 0.0145                                             | 10.4605                       | 25.3376  | -0.0054                            | 0.2147       | 0.0028                |
|      | 57607.38886             | -47.6294                                  | 0.0145                                             | 10.4123                       | 28.2874  | 0.0037                             | 0.2135       | 0.0030                |
|      | 57612.47728             | -40.2406                                  | 0.0110                                             | 10.3402                       | 28.9602  | 0.0079                             | 0.2116       | 0.0023                |
|      | 57623.37736             | -20.3825                                  | 0.0100                                             | 10.2928                       | 29.0664  | -0.0093                            | 0.2032       | 0.0020                |
|      | 57626.38491             | -21.8607                                  | 0.0110                                             | 10.3395                       | 28.9280  | 0.0329                             | 0.2063       | 0.0022                |
|      | 57634.40704             | -32.0631                                  | 0.0109                                             | 10.3925                       | 28.9876  | -0.067                             | 0.2092       | 0.0023                |
|      | 57719.26505             | -36.2183                                  | 0.0095                                             | 10.3290                       | 28.9030  | 0.0201                             | 0.1966       | 0.0018                |
|      | 57746.26923             | -20.3795                                  | 0.0084                                             | 10.3404                       | 29.0733  | -0.0067                            | 0.2122       | 0.0016                |
|      | 57815.65363             | -44.9376                                  | 0.0098                                             | 10.3132                       | 27.1330  | -0.0004                            | 0.2095       | 0.0018                |
|      | 57815.67731             | -44.8993                                  | 0.0083                                             | 10.3249                       | 29.1040  | 0.0086                             | 0.2080       | 0.0016                |
|      | 57850.59947             | -46.6829                                  | 0.0091                                             | 10.3250                       | 27.0881  | 0.0033                             | 0.2069       | 0.0017                |
|      | 57850.62308             | -46.7070                                  | 0.0119                                             | 10.2789                       | 28.0442  | -0.0021                            | 0.2067       | 0.0022                |
|      | 57858.58652             | -41.1658                                  | 0.0146                                             | 10.2378                       | 23.9695  | -0.0255                            | 0.1882       | 0.0025                |
|      | 57860.61247             | -35.6563                                  | 0.0186                                             | 10.2443                       | 23.5034  | 0.0100                             | 0.1941       | 0.0032                |
|      | 57881.49587             | -33.0003                                  | 0.0175                                             | 10.2694                       | 22.2896  | -0.0211                            | 0.2216       | 0.0030                |
|      | 57881.51944             | -33.0316                                  | 0.0158                                             | 10.2409                       | 25.8066  | 0.0089                             | 0.2109       | 0.0029                |
|      | 57890.53416             | -45.6792                                  | 0.0089                                             | 10.2779                       | 27.3843  | 0.0160                             | 0.1951       | 0.0016                |
|      | 57890.57816             | -45.7231                                  | 0.0081                                             | 10.2384                       | 27.7725  | -0.0009                            | 0.1910       | 0.0015                |
|      | 57914.55102             | -22.4041                                  | 0.0110                                             | 10.2004                       | 25.3872  | -0.0078                            | 0.2151       | 0.0020                |
|      | 57914.57472             | -22.4272                                  | 0.0084                                             | 10.2139                       | 27.9878  | 0.0084                             | 0.2134       | 0.0016                |
|      | 57924.49590             | -35.9753                                  | 0.0099                                             | 10.2853                       | 27.2617  | 0.0267                             | 0.1996       | 0.0018                |
|      | 57924.52118             | -36.0181                                  | 0.0103                                             | 10.2534                       | 28.8795  | 0.0171                             | 0.2012       | 0.0020                |
|      | 57936.48767             | -47.4623                                  | 0.0106                                             | 10.2734                       | 26.9318  | 0.0141                             | 0.1932       | 0.0020                |
|      | 57936.51133             | -47.4660                                  | 0.0113                                             | 10.3536                       | 28.5829  | -0.0057                            | 0.1917       | 0.0021                |
|      | 57954.37721             | -21.3857                                  | 0.0134                                             | 10.2930                       | 25.3470  | 0.0145                             | 0.2031       | 0.0024                |
|      | 57955.36873             | -22.1650                                  | 0.0129                                             | 10.2899                       | 25.3384  | -0.0119                            | 0.2043       | 0.0022                |
|      | 57970.44413             | -43.0893                                  | 0.0085                                             | 10.2438                       | 28.2732  | 0.0268                             | 0.1914       | 0.0016                |
|      | 57970.46806             | -43.1358                                  | 0.0082                                             | 10.2520                       | 28.9462  | 0.0077                             | 0.1877       | 0.0015                |
|      | 57989.42736             | -22.4627                                  | 0.0097                                             | 10.2269                       | 27.1918  | 0.0127                             | 0.1965       | 0.0017                |
|      | 57989.45189             | -22.4383                                  | 0.0091                                             | 10.2555                       | 29.0876  | -0.0119                            | 0.1930       | 0.0017                |
|      | 57999.37737             | -25.3762                                  | 0.0160                                             | 10.2317                       | 23.9715  | -0.0013                            | 0.1971       | 0.0027                |
| W    | 58003.32008             | -3.1611                                   | 0.0199                                             | 7.5424                        | 24.2589  | 0.0161                             | 0.2016       | 0.0045                |
|      | 58003.42095             | -31.0632                                  | 0.0141                                             | 10.1974                       | 23.2722  | -0.0428                            | 0.1954       | 0.0023                |
|      | 58007.42352             | -37.1754                                  | 0.0142                                             | 10.3020                       | 28.2437  | 0.0059                             | 0.1924       | 0.0027                |
|      | 58026.32236             | -31.5767                                  | 0.0100                                             | 10.2828                       | 26.6464  | 0.0082                             | 0.2004       | 0.0018                |
|      | 58029.34747             | -24.2823                                  | 0.0086                                             | 10.2444                       | 31.1481  | -0.0078                            | 0.1962       | 0.0018                |
| B    | 58034.33565             | -20.4064                                  | 0.0114                                             | 10.2145                       | 31.4902  | -0.0954                            | 0.1925       | 0.0024                |
|      | 58038.28757             | -22.8921                                  | 0.0085                                             | 10.2171                       | 29.0859  | -0.0010                            | 0.1947       | 0.0016                |
|      | 58043.30107             | -29.2555                                  | 0.0088                                             | 10.1869                       | 27.6237  | 0.0084                             | 0.1888       | 0.0016                |
|      | 58049.33656             | -38.4188                                  | 0.0190                                             | 10.3105                       | 23.6222  | -0.0004                            | 0.2151       | 0.0033                |
| O    | 58057.38946             | -47.4170                                  | 0.0127                                             | 10.3516                       | 27.6078  | 0.0028                             | 0.1924       | 0.0022                |

Table continues next page...

| flag | BJD         | $V_{\text{rad}}$ | $\sigma_{V_{\text{rad}}}$ | FWHM    | contrast | bis. span | $H_{\alpha}$ | $\sigma_{H_{\alpha}}$ |
|------|-------------|------------------|---------------------------|---------|----------|-----------|--------------|-----------------------|
|      | 58066.32858 | -34.6758         | 0.0173                    | 10.2573 | 23.9592  | 0.0012    | 0.2000       | 0.0029                |
|      | 58076.24290 | -20.6229         | 0.0109                    | 10.2381 | 26.3816  | 0.0227    | 0.1993       | 0.0020                |
|      | 58084.24172 | -29.0736         | 0.0402                    | 10.3369 | 17.3316  | 0.0183    | 0.2143       | 0.0061                |
|      | 58227.56803 | -42.8215         | 0.0095                    | 10.3294 | 29.2382  | 0.0159    | 0.1975       | 0.0018                |
|      | 58231.59284 | -31.9304         | 0.0115                    | 10.3272 | 28.2728  | -0.0126   | 0.1911       | 0.0022                |
|      | 58255.55341 | -39.6783         | 0.0111                    | 10.2862 | 26.8276  | -0.0023   | 0.1972       | 0.0020                |
| U    | 58271.53928 | -35.2297         | 0.0775                    | 10.4414 | 14.1731  | 0.0514    | 0.2170       | 0.0113                |
|      | 58289.48662 | -28.8597         | 0.0086                    | 10.2324 | 27.6608  | 0.0124    | 0.1940       | 0.0016                |
|      | 58294.41403 | -36.2932         | 0.0238                    | 10.1405 | 19.6541  | -0.0463   | 0.1980       | 0.0038                |
|      | 58301.52589 | -45.8824         | 0.0094                    | 10.2594 | 27.0071  | -0.0092   | 0.1856       | 0.0017                |
|      | 58319.49236 | -21.0086         | 0.0095                    | 10.232  | 27.3731  | -0.0159   | 0.1864       | 0.0017                |
|      | 58329.35035 | -27.1417         | 0.0123                    | 10.1726 | 26.8217  | 0.0135    | 0.1895       | 0.0024                |
|      | 58364.49871 | -20.9710         | 0.0095                    | 10.2804 | 29.4757  | 0.0077    | 0.1917       | 0.0018                |
|      | 58373.38714 | -31.4460         | 0.0085                    | 10.2349 | 28.9319  | -0.0064   | 0.1959       | 0.0017                |
|      | 58389.28389 | -46.7948         | 0.0085                    | 10.2759 | 28.4801  | -0.0032   | 0.1936       | 0.0017                |
| W    | 58398.33382 | 2.0217           | 0.0162                    | 7.6074  | 33.8799  | -0.0066   | 9999.99      | 9999.99               |
|      | 58410.34703 | -25.6250         | 0.0107                    | 10.2377 | 30.7540  | 0.0084    | 0.1970       | 0.0023                |
|      | 58414.31942 | -31.2461         | 0.0135                    | 10.2164 | 26.4540  | -0.0110   | 0.2059       | 0.0026                |
|      | 58438.23468 | -28.5063         | 0.0086                    | 10.2149 | 28.7501  | -0.0001   | 0.2048       | 0.0017                |
|      | 58440.32791 | -23.9560         | 0.0141                    | 10.4258 | 30.7245  | 0.0284    | 0.2063       | 0.0030                |
|      | 58447.28753 | -21.3746         | 0.0085                    | 10.2282 | 30.6147  | -0.0060   | 0.1972       | 0.0018                |
|      | 58536.69186 | -29.9300         | 0.0131                    | 10.2127 | 26.6076  | -0.0381   | 0.1960       | 0.0026                |
|      | 58539.69622 | -34.4673         | 0.0101                    | 10.3190 | 28.0285  | -0.0214   | 0.1959       | 0.002                 |
|      | 58542.70128 | -39.0813         | 0.0096                    | 10.2536 | 28.4771  | -0.0302   | 0.2042       | 0.0019                |
|      | 58557.68116 | -39.1923         | 0.0161                    | 10.2757 | 27.2871  | 0.0405    | 0.2019       | 0.0033                |
|      | 58569.61968 | -20.8305         | 0.0122                    | 10.2296 | 27.7821  | -0.0081   | 0.2002       | 0.0024                |
|      | 58617.59111 | -28.1421         | 0.0091                    | 10.2460 | 28.7484  | -0.0038   | 0.2015       | 0.0018                |
|      | 58626.46789 | -41.4286         | 0.0107                    | 10.2794 | 25.8409  | 0.0075    | 0.2010       | 0.0020                |
|      | 58634.53897 | -47.5651         | 0.0093                    | 10.2481 | 26.5013  | -0.0039   | 0.2018       | 0.0018                |
|      | 58638.43325 | -42.6407         | 0.0126                    | 10.2794 | 28.4741  | -0.0223   | 0.2039       | 0.0026                |
|      | 58650.53936 | -20.4374         | 0.0152                    | 10.1724 | 26.3894  | 0.0132    | 0.2030       | 0.0031                |
|      | 58654.49571 | -22.9659         | 0.0097                    | 10.2282 | 28.3680  | -0.0006   | 0.1971       | 0.0019                |
|      | 58660.56745 | -30.9076         | 0.0102                    | 10.2163 | 28.9174  | -0.0113   | 0.1984       | 0.0022                |
|      | 58665.57318 | -38.5290         | 0.0140                    | 10.2965 | 27.5442  | 0.0455    | 0.1981       | 0.0028                |
|      | 58675.57952 | -47.5981         | 0.0109                    | 10.3365 | 27.6547  | 0.0017    | 0.1965       | 0.0022                |
|      | 58687.61864 | -22.6485         | 0.0225                    | 10.3376 | 23.7336  | 0.0388    | 0.2054       | 0.0043                |
|      | 58703.54677 | -33.7950         | 0.0175                    | 10.3134 | 26.0287  | 0.0192    | 0.2010       | 0.0036                |
|      | 58706.50803 | -38.3266         | 0.0100                    | 10.2295 | 28.0761  | -0.0120   | 0.1982       | 0.0020                |
|      | 58708.50232 | -41.2314         | 0.0301                    | 10.2930 | 16.0707  | -0.0426   | 0.1994       | 0.0047                |
| B    | 58732.43751 | -20.3947         | 0.0302                    | 10.2203 | 25.1441  | -0.1346   | 0.2322       | 0.0062                |
|      | 58734.44238 | -21.1078         | 0.0155                    | 10.2528 | 27.1499  | -0.0207   | 0.2124       | 0.0031                |
|      | 58738.38163 | -24.8845         | 0.0105                    | 10.1784 | 27.7775  | -0.0244   | 0.2003       | 0.0021                |
|      | 58753.33846 | -45.8380         | 0.0075                    | 10.2737 | 28.6564  | -0.0095   | 0.202        | 0.0016                |
|      | 58757.43639 | -47.6475         | 0.0099                    | 10.3475 | 28.4233  | 0.0141    | 0.2001       | 0.0020                |
|      | 58760.37181 | -45.0829         | 0.0118                    | 10.2839 | 28.1836  | 0.0119    | 0.1973       | 0.0024                |
|      | 58765.41646 | -32.4426         | 0.0094                    | 10.2947 | 28.2387  | 0.0005    | 0.2029       | 0.0019                |
|      | 58794.31837 | -45.7701         | 0.0157                    | 10.3120 | 26.8288  | -0.0071   | 0.2012       | 0.0031                |
|      | 58804.24157 | -38.9032         | 0.0122                    | 10.3048 | 27.9886  | 0.0424    | 0.2025       | 0.0024                |
|      | 58820.22529 | -24.4962         | 0.0149                    | 10.3393 | 26.6102  | -0.0071   | 0.2153       | 0.0030                |
|      | 58824.24004 | -29.9520         | 0.0094                    | 10.2552 | 28.2000  | 0.0245    | 0.2090       | 0.0019                |
|      | 58828.27635 | -36.0832         | 0.0198                    | 10.4292 | 23.1762  | -0.0434   | 0.2019       | 0.0034                |
| B    | 58919.69124 | -47.3685         | 0.0208                    | 10.3504 | 24.6286  | -0.1229   | 0.2077       | 0.0041                |
|      | 58998.56140 | -44.5035         | 0.0109                    | 10.3115 | 28.8681  | 0.0086    | 0.1939       | 0.0022                |
|      | 59009.49993 | -39.2485         | 0.0122                    | 10.2756 | 27.7224  | -0.0107   | 0.2039       | 0.0025                |
|      | 59023.55894 | -22.3117         | 0.0099                    | 10.2759 | 28.5419  | -0.0080   | 0.1996       | 0.0019                |
|      | 59030.43413 | -31.1164         | 0.0095                    | 10.2358 | 28.4005  | 0.0120    | 0.1979       | 0.0019                |
|      | 59042.42642 | -47.0737         | 0.0101                    | 10.2934 | 28.2747  | 0.0043    | 0.2012       | 0.0020                |
|      | 59046.54366 | -46.7980         | 0.0123                    | 10.2777 | 28.0726  | -0.0441   | 0.1967       | 0.0026                |
|      | 59067.42681 | -25.4159         | 0.0097                    | 10.2439 | 28.0315  | 0.0085    | 0.1974       | 0.0019                |

Table continues next page...

| flag | BJD         | $V_{\text{rad}}$ | $\sigma_{V_{\text{rad}}}$ | FWHM    | contrast | bis. span | $H_{\alpha}$ | $\sigma_{H_{\alpha}}$ |
|------|-------------|------------------|---------------------------|---------|----------|-----------|--------------|-----------------------|
|      | 59073.55426 | -34.2494         | 0.0093                    | 10.3336 | 28.3985  | 0.0340    | 0.2080       | 0.0019                |
|      | 59077.48604 | -40.2255         | 0.0157                    | 10.2866 | 27.4415  | 0.0209    | 0.2072       | 0.0034                |
|      | 59089.39809 | -44.3841         | 0.0099                    | 10.3046 | 28.1461  | 0.0012    | 0.2066       | 0.0020                |
|      | 59093.41074 | -34.3069         | 0.0151                    | 10.2234 | 26.0449  | -0.0083   | 0.2102       | 0.0031                |
|      | 59095.45922 | -28.5598         | 0.0098                    | 10.1601 | 27.3818  | 0.0041    | 0.1988       | 0.0020                |
|      | 59101.49898 | -20.3988         | 0.0089                    | 10.2738 | 28.4152  | -0.006    | 0.2009       | 0.0017                |
|      | 59102.51980 | -20.4328         | 0.0122                    | 10.5231 | 27.0339  | 0.0343    | 0.1998       | 0.0022                |
|      | 59121.39686 | -44.0417         | 0.0142                    | 10.2192 | 24.6636  | -0.0090   | 0.2162       | 0.0028                |
|      | 59123.35979 | -46.1410         | 0.0093                    | 10.2626 | 27.3614  | 0.0051    | 0.2093       | 0.0018                |
|      | 59131.39916 | -42.5350         | 0.0104                    | 10.2861 | 28.3114  | 0.0065    | 0.2073       | 0.0021                |
|      | 59137.28463 | -26.7021         | 0.0091                    | 10.2698 | 28.7466  | 0.0254    | 0.2025       | 0.0018                |
|      | 59154.32126 | -32.1154         | 0.0102                    | 10.3170 | 26.7867  | -0.0023   | 0.2072       | 0.0019                |
|      | 59157.36523 | -36.7752         | 0.0177                    | 10.2287 | 25.1757  | 0.0102    | 0.2177       | 0.0035                |
|      | 59162.32683 | -43.8233         | 0.0349                    | 10.6452 | 24.2053  | -0.0007   | 0.2148       | 0.0072                |
|      | 59165.27801 | -46.8031         | 0.0093                    | 10.3282 | 28.3817  | 0.0336    | 0.2066       | 0.0019                |
|      | 59172.32740 | -42.8424         | 0.0082                    | 10.4652 | 28.6099  | -0.0162   | 0.2052       | 0.0016                |
| B    | 59181.27395 | -21.7546         | 0.0168                    | 10.3768 | 31.0919  | -0.1028   | 0.1955       | 0.0039                |
|      | 59266.69524 | -20.3963         | 0.0109                    | 10.3016 | 28.3442  | 0.0245    | 0.2087       | 0.0022                |
|      | 59269.69460 | -22.0169         | 0.0109                    | 10.3060 | 28.0074  | 0.0154    | 0.2067       | 0.0022                |
|      | 59270.67941 | -22.9506         | 0.0118                    | 10.2768 | 26.9761  | 0.0561    | 0.2142       | 0.0024                |
|      | 59275.70395 | -29.3537         | 0.0133                    | 10.2461 | 26.0009  | -0.0098   | 0.2156       | 0.0027                |
|      | 59280.69715 | -36.9685         | 0.0146                    | 10.2385 | 27.3492  | 0.0137    | 0.2127       | 0.0030                |
|      | 59297.61346 | -37.7124         | 0.0090                    | 10.3029 | 28.4720  | 0.0267    | 0.1983       | 0.0018                |
|      | 59299.64512 | -31.8527         | 0.0094                    | 10.3205 | 28.1204  | -0.0358   | 0.202        | 0.0019                |
|      | 59303.60959 | -22.8602         | 0.0096                    | 10.2401 | 27.2753  | 0.0383    | 0.1987       | 0.0019                |
|      | 59305.61783 | -20.8265         | 0.0088                    | 10.2858 | 28.0542  | 0.0050    | 0.2126       | 0.0018                |
|      | 59349.50200 | -20.5659         | 0.0262                    | 10.4567 | 25.5230  | 0.0576    | 0.2089       | 0.0054                |
|      | 59354.55499 | -24.8984         | 0.0143                    | 10.2426 | 28.2716  | 0.0149    | 0.2148       | 0.0031                |
|      | 59363.59631 | -38.0943         | 0.0097                    | 10.2586 | 27.9776  | 0.0149    | 0.2057       | 0.0020                |
|      | 59366.52159 | -42.3251         | 0.0116                    | 10.2845 | 28.0478  | 0.0281    | 0.2116       | 0.0024                |
|      | 59369.57437 | -45.8980         | 0.0086                    | 10.3087 | 28.8846  | -0.0363   | 0.2094       | 0.0018                |
|      | 59371.53106 | -47.3490         | 0.0106                    | 10.3614 | 28.6411  | -0.0433   | 0.2137       | 0.0022                |
|      | 59375.55836 | -46.3745         | 0.0088                    | 10.2746 | 28.9782  | 0.0130    | 0.2074       | 0.0018                |
|      | 59378.56443 | -40.9102         | 0.0100                    | 10.3196 | 28.9479  | -0.0039   | 0.2053       | 0.0021                |
|      | 59382.54493 | -29.7562         | 0.0129                    | 10.2722 | 28.2695  | 0.0240    | 0.2016       | 0.0027                |
|      | 59387.49783 | -21.0110         | 0.0123                    | 10.2471 | 26.8552  | 0.0086    | 0.2108       | 0.0024                |
|      | 59388.44241 | -20.4912         | 0.0133                    | 10.2164 | 26.7626  | 0.0178    | 0.2056       | 0.0027                |
